# Supplementary material for: Modeling Cortisol Dynamics in the Neuro-endocrine Axis Distinguishes Normal, Depression, and Post-traumatic Stress Disorder (PTSD) in Humans
Source: PLOS journal article supplement (doi:10.1371/journal.pcbi.1002379), 2012-02-16
Supplement: S3 (10.1371/journal.pcbi.1002379.s003) [file journal.pcbi.1002379.s003]

301 Moved Permanently

# Moved Permanently

The document has moved here.

---

Apache Server at www.ploscompbiol.org Port 80
